# Supplementary material for: Performance Evaluation of Microscanner Plus, an Automated Image-Based Cell Counter, for Counting CD4+ T Lymphocytes in HIV Patients
Source: MDPI journal article supplement (doi:10.3390/diagnostics14010073), 2023-12-28
Supplement: s1 [file s1]

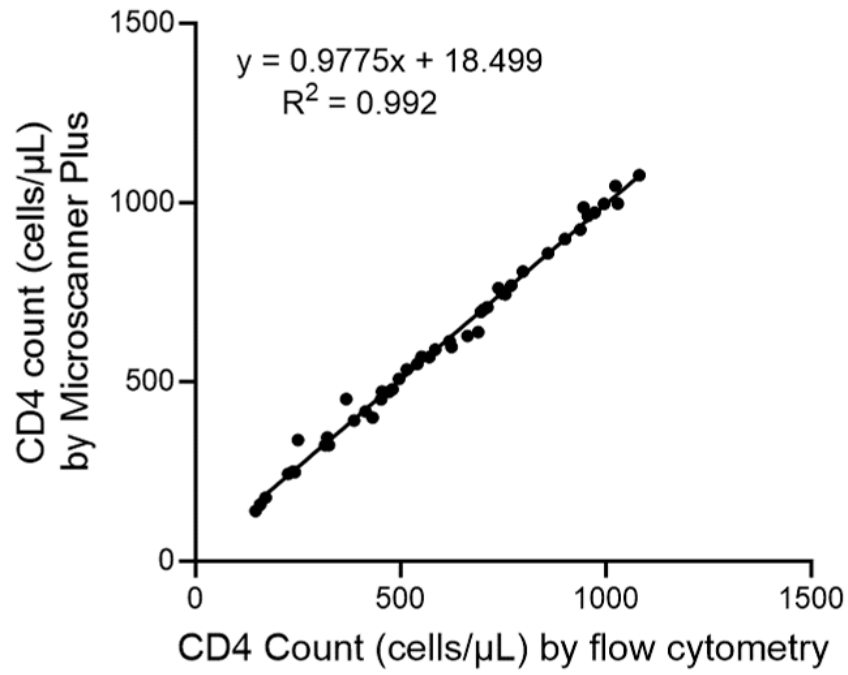

**Figure S1.** Correlation of CD4 counts measured by Microscanner plus (MSP) and Flow cytometry (FCM) for 46 clinical samples with a lymphocyte/WBC ratio of less than 20%.

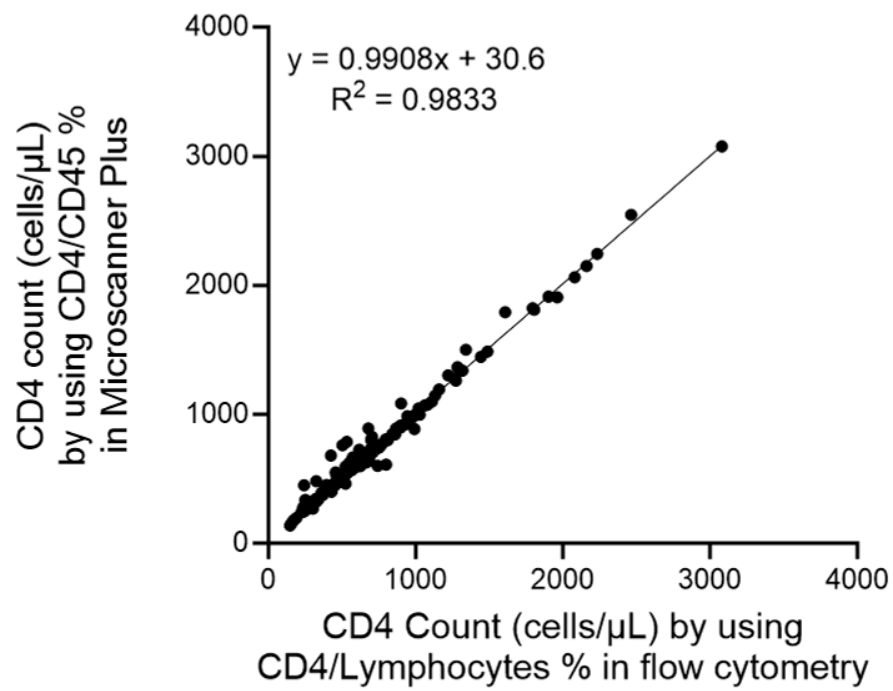

**Figure S2.** Correlation of CD4 counts measured by Microscanner plus (MSP) with CD4/CD45% and Flow cytometry (FCM) with CD4/Lymphocytes % for 134 clinical samples.
